# Supplementary material for: Computational Assessment of Spectral Heterogeneity within Fresh Glioblastoma Tissue Using Raman Spectroscopy and Machine Learning Algorithms
Source: Molecules. 2024 Feb 23;29(5):979. doi: 10.3390/molecules29050979 (PMC10935394; doi:10.3390/molecules29050979)
Supplement: Supplementary file 1 [file molecules-29-00979-s001.zip › molecules-2743982-supplementary.pdf]

## **Supplemental Information**

### **Data preparation**

Initially data were split independently in a training and validation cohort (approx. 3:1) in which the number of measurements per patient was randomly reduced to 15. Both reduce the impact of potential patient specific classification and inherent data imbalance and allow generalization over each class. Subsequent machine learning algorithms and display of results were employed in Python using standard libraries such as scikit-learn, plotly and matplotlib.

### **Binary Random Forest classification, UMAP and K-means clustering**

Best model showed: max depth of the trees [10], minimum sample to consider a leaf [2], minimum samples to consider a split [5]. Employing the best decision threshold (0.452 - based on maximized f-1 score) of the previous internal CV, data re-curation and separation of data in necrotic and non-necrotic spectral data was conducted.

UMAP (Uniform Manifold Approximation and Projection) was performed and established with n\_neighbors=[20] and min\_dists=[0.01].

After the following k-means clustering analysis, k-means clusters (best n=21) were visualized within the spatial distribution of the previous UMAP and cluster assignments of measurements from a healthy autopsy brain as well as measurements of infiltration zones were predicted.

## **Supplemental Material – Figures**

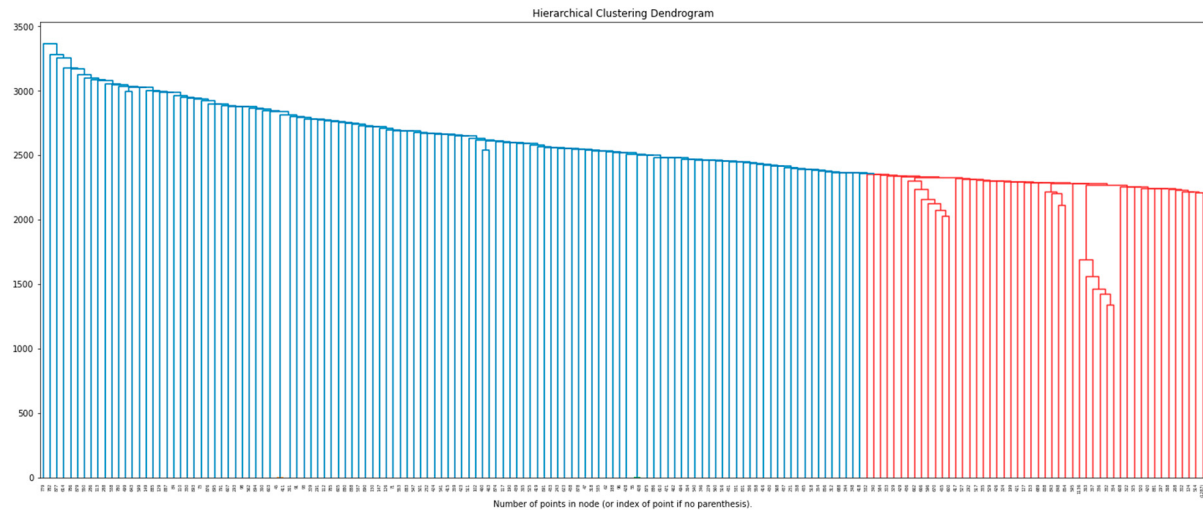

**Supp. Figure S1.** To initially determine strong artifacts and outliers, a distance-based hierarchical dendrogram was displayed.

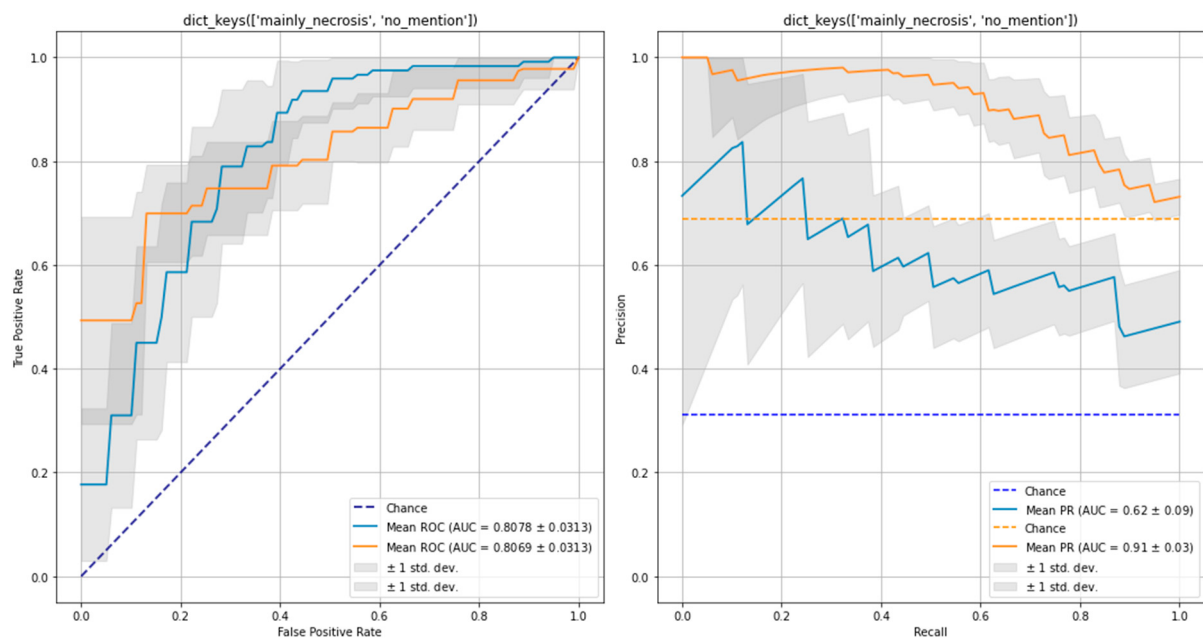

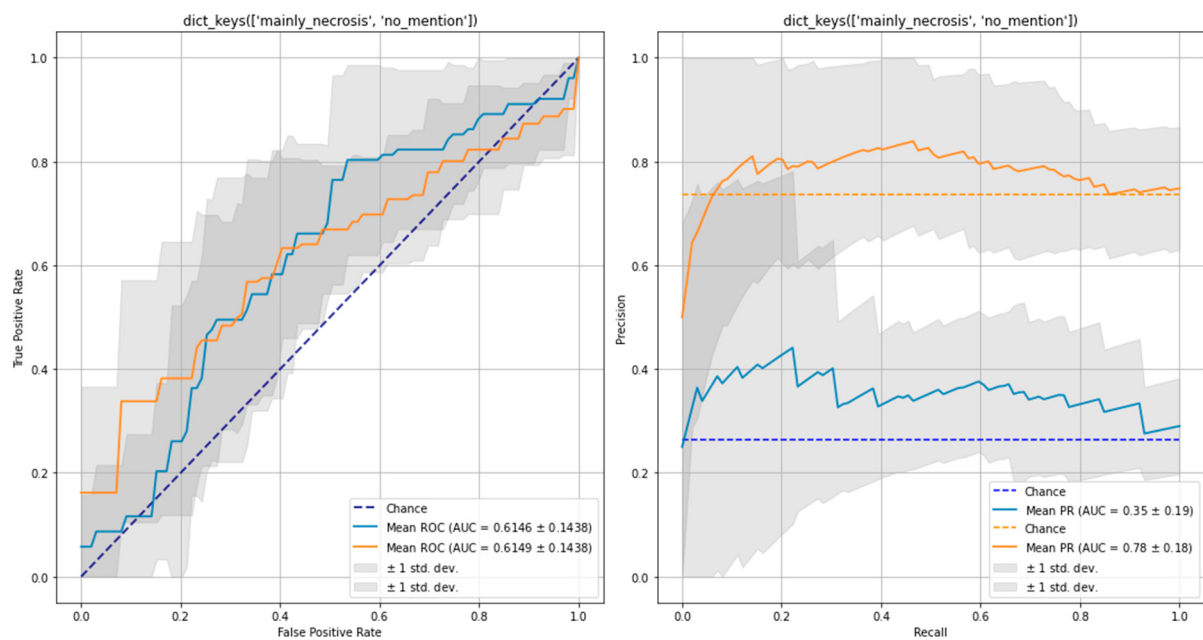

**Supp. Figure S2.** Evaluation of classifier performance using the external data set. Above: Cross validation with random data distribution. Below: Cross validation with patient-dependent data distribution.

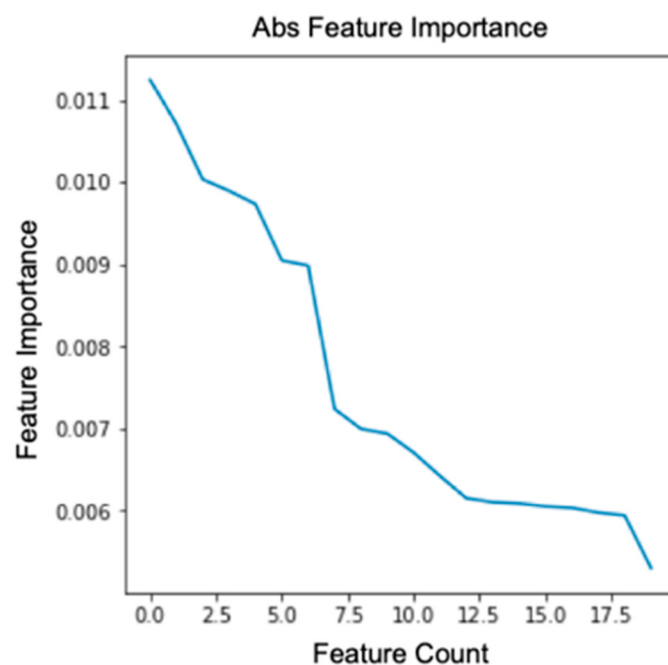

**Supp. Figure S3.** The feature importance analysis indicated a high complexity within the spectroscopic data since relevant features cannot be limited to a few frequency bins.

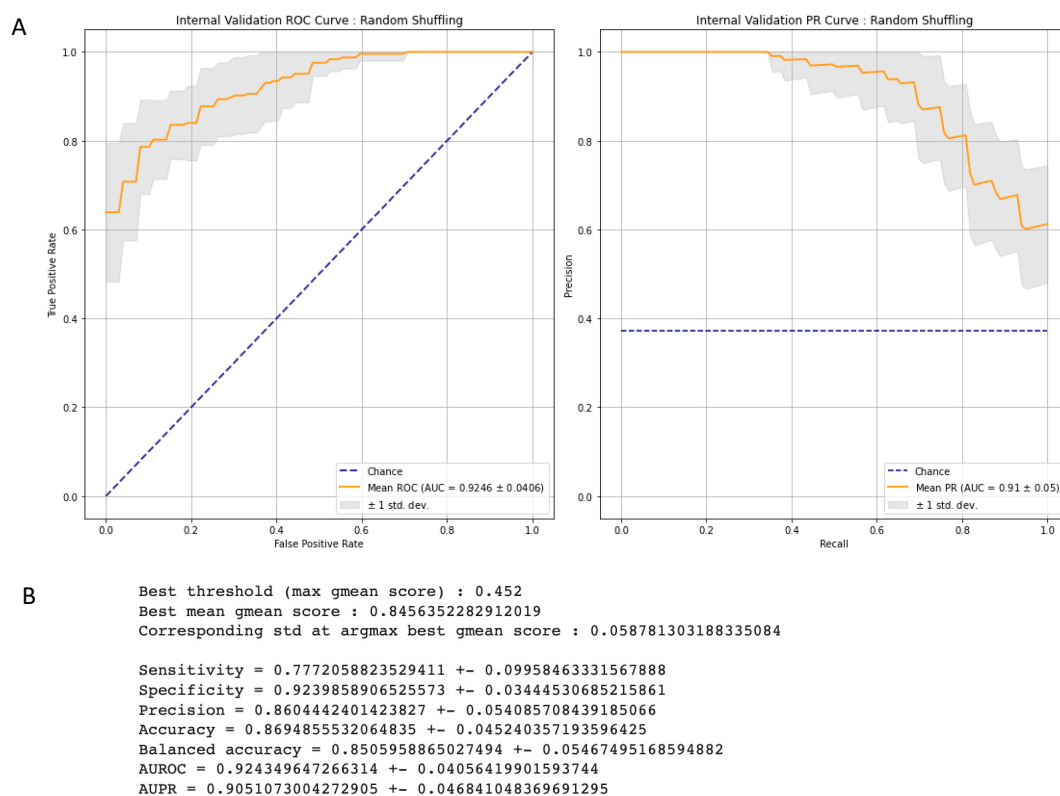

**Supp. Figure S4. A:** ROC and PR curve of the internal cross validation of our Random Forest classification. **B:** Corresponding metrics.

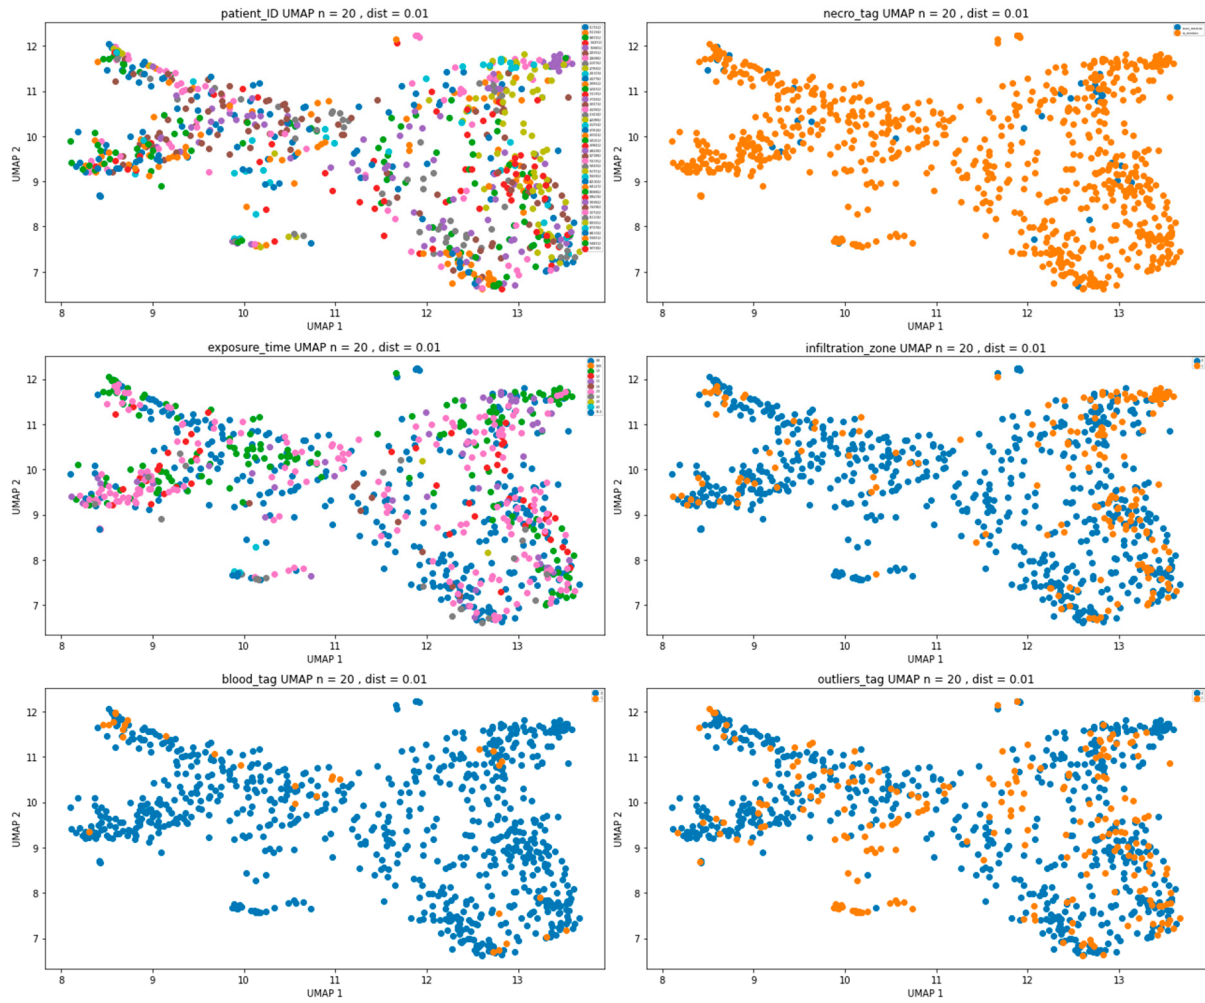

**Supp. Figure S5.** UMAP displacement reveals no distinct technical confounders (patient IDs and different exposure times) or biological differences (infiltration zone and hemorrhage).

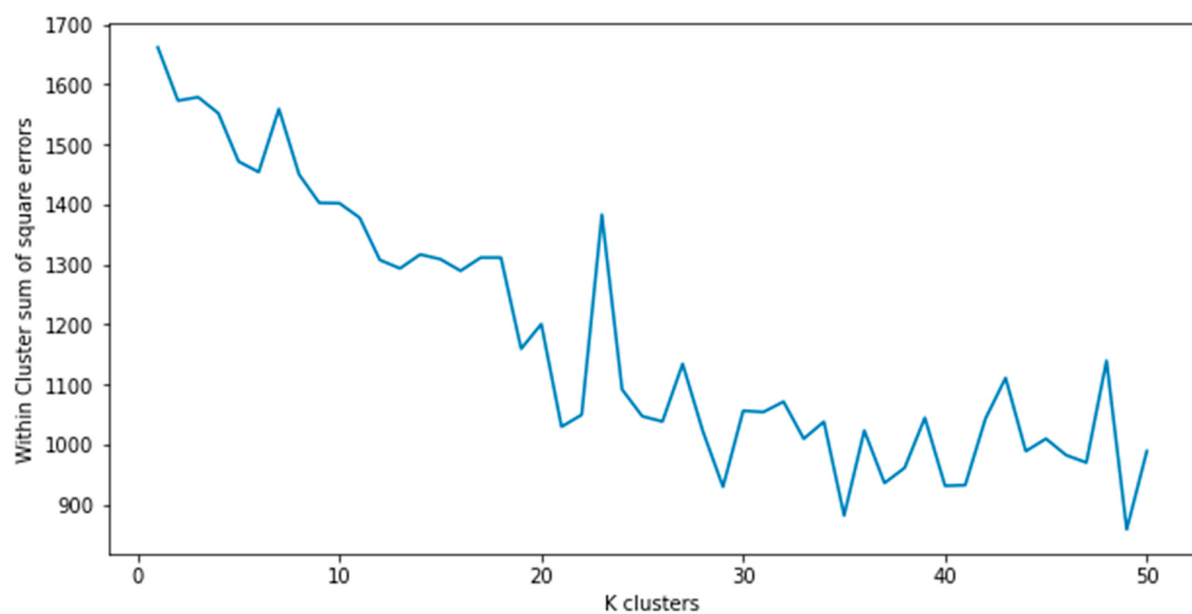

**Supp. Figure S6.** Evaluation of best k within kmax=50 on spectrally non-necrotic tissue.

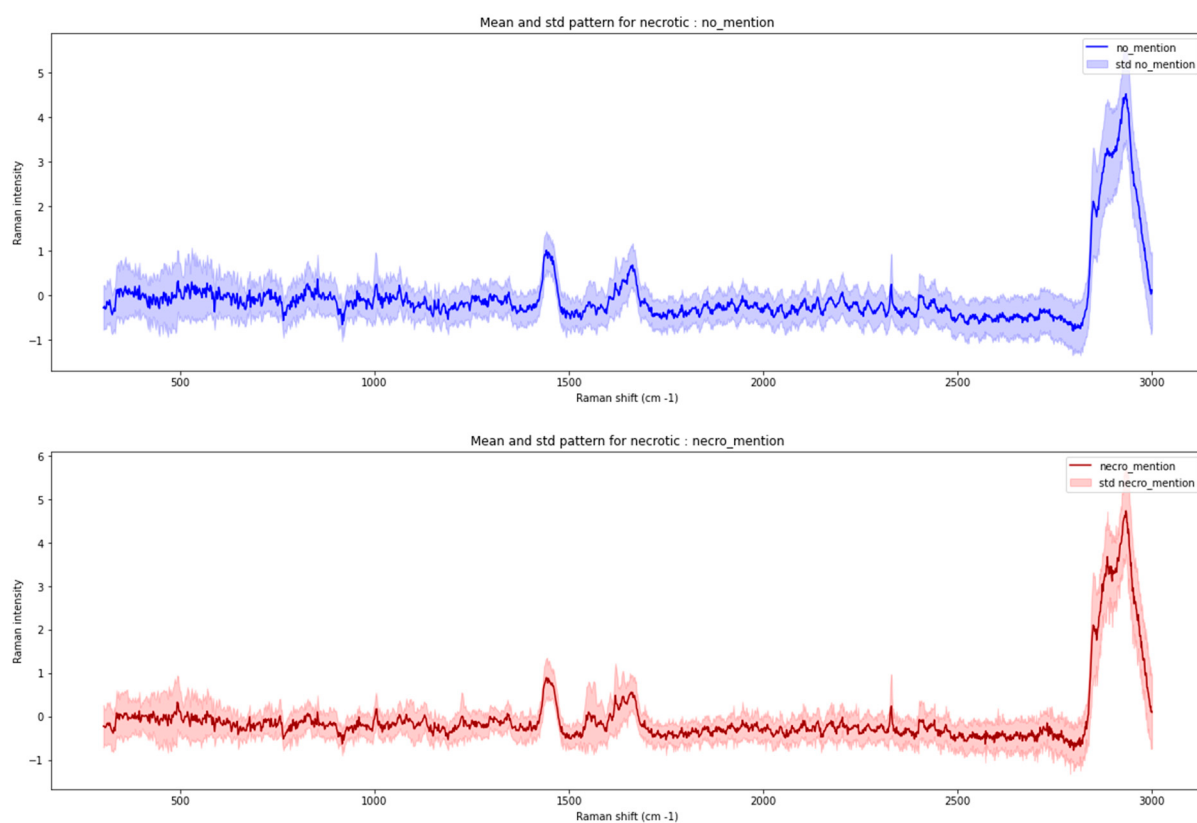

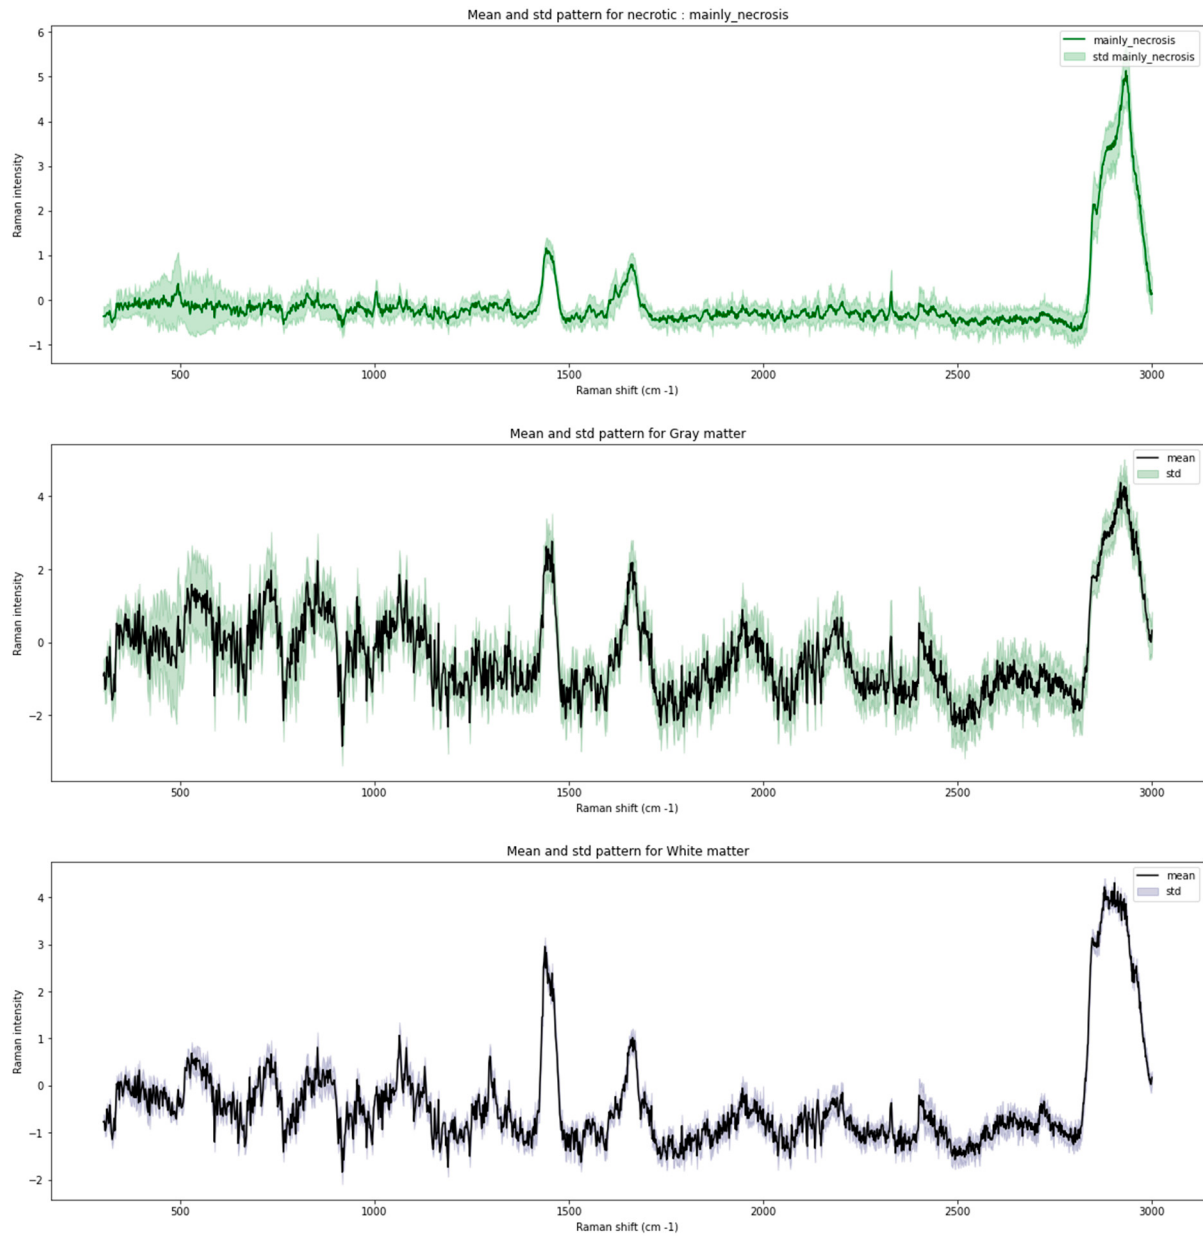

**Supp. Figure S7.** Data display. Mean and standard deviation for all three data classes (*'necrosis data set'*, *'vital data set'*, *heterogenous data set*) and autopsy brain tissue (*'grey matter'*, *'white matter'*).

## Supplemental Material – Tables

| patient no° | age | sex    | localization                    | IDH status                           | MGMT status  | primary / secondary / recurrence tumor |
|-------------|-----|--------|---------------------------------|--------------------------------------|--------------|----------------------------------------|
| 1           | 72  | female | right temporal                  | wildtype                             | methyated    | primary                                |
| 2           | 72  | male   | right opercular                 | wildtype                             | methyated    | primary                                |
| 3           | 64  | male   | right fronto-dorsal             | wildtype                             | methyated    | primary                                |
| 4           | 50  | female | left temporal                   | inconclusive: highest score wildtype | methyated    | primary                                |
| 5           | 64  | female | right occipital                 | wildtype                             | methyated    | primary                                |
| 6           | 49  | male   | left fronto-temporal            | wildtype                             | methyated    | primary                                |
| 7           | 58  | male   | supratentorial                  | wildtype                             | un-methyated | primary                                |
| 8           | 27  | male   | left frontal                    | mutant                               | un-methyated | not specified                          |
| 9           | 75  | female | right central                   | wildtype                             | un-methyated | secondary & recurrence                 |
| 10          | 67  | male   | left frontobasal & left frontal | wildtype                             | un-methyated | primary & recurrence                   |
| 11          | 50  | female | bifrontal                       | wildtype                             | methyated    | primary                                |
| 12          | 64  | male   | right temporal                  | wildtype                             | methyated    | primary                                |

|    |    |        |                          |                                      |              |            |
|----|----|--------|--------------------------|--------------------------------------|--------------|------------|
| 13 | 66 | male   | two tumors, left frontal | wildtype                             | methyated    | primary    |
| 14 | 70 | male   | left temporo-dorsal      | wildtype                             | un-methyated | primary    |
| 15 | 66 | male   | left temporal            | wildtype                             | un-methyated | primary    |
| 16 | 64 | female | right parietal           | wildtype                             | un-methyated | recurrence |
| 17 | 41 | female | right temporal           | mutant                               | inconclusive | secondary  |
| 18 | 62 | male   | left temporal            | wildtype                             | un-methyated | primary    |
| 19 | 45 | female | right temporal           | inconclusive: highest score wildtype | un-methyated | recurrence |
| 20 | 61 | m      | right parieto-occipital  | wildtype                             | methyated    | primary    |
| 21 | 61 | male   | right temporal           | wildtype                             | methyated    | recurrence |
| 22 | 53 | male   | corpus callosum          | wildtype                             | methyated    | primary    |
| 23 | 57 | male   | right frontal            | wildtype                             | un-methyated | primary    |
| 24 | 55 | female | left occipital           | wildtype                             | un-methyated | recurrence |
| 25 | 75 | female | right parietal           | wildtype                             | un-methyated | recurrence |

|    |    |        |                                     |                                      |               |                     |
|----|----|--------|-------------------------------------|--------------------------------------|---------------|---------------------|
| 26 | 67 | male   | temporo-insular                     | wildtype                             | not specified | primary             |
| 27 | 80 | male   | left frontal                        | wildtype                             | methyated     | Propably secondary  |
| 28 | 56 | male   | left temporo-occipital              | inconclusive: highest score wildtype | un-methyated  | 3rd recurrent tumor |
| 29 | 81 | male   | left temporal                       | wildtype                             | methyated     | primary             |
| 30 | 62 | male   | right occipital                     | wildtype                             | methyated     | rest / recurrence   |
| 31 | 44 | female | right frontal                       | wildtype                             | un-methyated  | primary             |
| 32 | 69 | male   | left fronto-parietal                | wildtype                             | un-methyated  | primary             |
| 33 | 44 | male   | temporo-mesial                      | wildtype                             | un-methyated  | recurrence          |
| 34 | 47 | male   | left marginal gyrus & parietal lobe | wildtype                             | methyated     | primary             |
| 35 | 69 | female | multifocal                          | wildtype                             | methyated     | primary             |
| 36 | 48 | female | not specified                       | wildtype                             | un-methyated  | primary             |
| 37 | 64 | male   | left temporal & parietal            | wildtype                             | methyated     | primary             |
| 38 | 61 | male   | frontoparietal                      | wildtype                             | methyated     | primary             |
| 39 | 66 | male   | parietal                            | wildtype                             | not specified | primary             |

|    |    |      |                   |          |                   |                         |
|----|----|------|-------------------|----------|-------------------|-------------------------|
| 40 | 37 | male | right<br>temporal | wildtype | not<br>specified  | primary &<br>recurrence |
| 41 | 50 | male | right<br>temporal | wildtype | un-<br>methylated | primary                 |
| 42 | 67 | male | right<br>parietal | wildtype | methylated        | recurrence              |
| 43 | 58 | male | left<br>occipital | wildtype | un-<br>methylated | primary &<br>recurrence |

**Supp. Table S1** lists all tumors included with corresponding patient's characteristics (age, sex), as well as clinical and biological features (localization, IDH-status (brain tumor classification classifier results (v11b4): wildtype/mutant; results with matching score <0.9 were considered inconclusive), MGMT-status (unmethylated/methylated), tumor recurrence).
